# Supplementary material for: Periprosthetic Joint Infection (PJI)—Results of One-Stage Revision with Antibiotic-Impregnated Cancellous Allograft Bone—A Retrospective Cohort Study
Source: MDPI journal article supplement (doi:10.3390/antibiotics11030310), 2022-02-25
Supplement: s1 [file s1]

|                                                                                                                               |                                                                                                                                                                                                                                                                                                                                                                                                                                                                                                                                                                                                                                                                                                                                                                                                                                                                                     |
|-------------------------------------------------------------------------------------------------------------------------------|-------------------------------------------------------------------------------------------------------------------------------------------------------------------------------------------------------------------------------------------------------------------------------------------------------------------------------------------------------------------------------------------------------------------------------------------------------------------------------------------------------------------------------------------------------------------------------------------------------------------------------------------------------------------------------------------------------------------------------------------------------------------------------------------------------------------------------------------------------------------------------------|
|                                                                                                                               | <div>DD MM YYYY</div> <div>DD MM YYYY</div>                                                                                                                                                                                                                                                                                                                                                                                                                                                                                                                                                                                                                                                                                                                                                                                                                                         |
| <b>1.3) If <u>yes</u>, what has been done during that surgery (or those surgeries)?</b><br><i>(Multiple answers possible)</i> | <input type="checkbox"/> Lavage<br><input type="checkbox"/> Synovectomy<br><input type="checkbox"/> Total prosthesis replacement<br><input type="checkbox"/> Partial prosthesis replacement<br><input type="checkbox"/> Inlay replacement<br><input type="checkbox"/> Patella implantation/-replacement<br><input type="checkbox"/> Prosthesis removal<br><input type="checkbox"/> Spacer implantation<br><input type="checkbox"/> Joint stiffening (Arthrodesis)<br><input type="checkbox"/> Amputation<br><input type="checkbox"/> Fistula/ Sinus tract removal<br><input type="checkbox"/> Negative pressure wound therapy/ Vacuum assisted closure (VAC)<br><input type="checkbox"/> Open reduction of a joint dislocation<br><input type="checkbox"/> Closed reduction of a joint dislocation<br><input type="checkbox"/> Other _____<br><input type="checkbox"/> I don't know |
| <b>2.1) Did you have a joint infection at your right/left knee/hip joint since XX.XX.XXXX?</b>                                | <input type="checkbox"/> Yes<br><input type="checkbox"/> No<br><input type="checkbox"/> I don't know                                                                                                                                                                                                                                                                                                                                                                                                                                                                                                                                                                                                                                                                                                                                                                                |
| <b>2.2) If <u>yes</u>, when has it been diagnosed?</b><br><i>(Year and month are sufficient)</i>                              | <div>DD MM YYYY</div>                                                                                                                                                                                                                                                                                                                                                                                                                                                                                                                                                                                                                                                                                                                                                                                                                                                               |
| <b>2.3) If <u>yes</u>, how has it been diagnosed?</b><br><i>(Multiple answers possible)</i>                                   | <input type="checkbox"/> Joint aspiration<br><input type="checkbox"/> Intraoperative sample/microbial culture<br><input type="checkbox"/> Blood analysis<br><input type="checkbox"/> Symptoms<br><input type="checkbox"/> Wound healing disorder<br><input type="checkbox"/> Fistula/ Sinus tract<br><input type="checkbox"/> Scintigraphy<br><input type="checkbox"/> Radiology (X-Ray, MRI, CT,...)<br><input type="checkbox"/> Other _____<br><input type="checkbox"/> I don't know                                                                                                                                                                                                                                                                                                                                                                                              |
| <b>3.1) Has the patient passed away?</b>                                                                                      | <input type="checkbox"/> Yes                                                                                                                                                                                                                                                                                                                                                                                                                                                                                                                                                                                                                                                                                                                                                                                                                                                        |

|                                                                            |                                                                              |      |    |      |
|----------------------------------------------------------------------------|------------------------------------------------------------------------------|------|----|------|
|                                                                            | <input type="checkbox"/> No                                                  |      |    |      |
| <b>3.2) If <u>yes</u>, when?</b>                                           | <table border="1"> <tr> <td>DD</td> <td>MM</td> <td>YYYY</td> </tr> </table> | DD   | MM | YYYY |
| DD                                                                         | MM                                                                           | YYYY |    |      |
| <b>4.1) Is there anything else that you want to tell us?</b><br>(Optional) |                                                                              |      |    |      |

Figure S3. Patient questionnaire sent to national patients.

### Patienten-Fragebogen

Zutreffendes bitte mit einem X ankreuzen. Sollte es Probleme beim Beantworten einer Frage geben, dann kontaktieren Sie mich bitte unter XXXX / gregor.dersch@gmail.com oder kreuzen Sie als Antwort "weiß ich nicht" an.

|                                                                                                                                                                             |                                                                                                                                                                                                                                                                                                                                                                                                                                                                                                                                                                                                                                                                                                                                                                           |      |    |      |    |    |      |    |    |      |
|-----------------------------------------------------------------------------------------------------------------------------------------------------------------------------|---------------------------------------------------------------------------------------------------------------------------------------------------------------------------------------------------------------------------------------------------------------------------------------------------------------------------------------------------------------------------------------------------------------------------------------------------------------------------------------------------------------------------------------------------------------------------------------------------------------------------------------------------------------------------------------------------------------------------------------------------------------------------|------|----|------|----|----|------|----|----|------|
| <b>1.1) Bei Ihnen wurde am XX.XX.XXXX am rechten/linken Kniegelenk/Hüftgelenk ein Prothesenwechsel durchgeführt. Wurden Sie seitdem nochmals an dieser Stelle operiert?</b> | <input type="checkbox"/> ja<br><input type="checkbox"/> nein<br><input type="checkbox"/> weiß ich nicht                                                                                                                                                                                                                                                                                                                                                                                                                                                                                                                                                                                                                                                                   |      |    |      |    |    |      |    |    |      |
| <b>1.2) Wenn <u>ja</u>, wann war das?</b><br>(Mehrere Nennungen möglich)                                                                                                    | <table border="1"> <tr> <td>TT</td> <td>MM</td> <td>JJJJ</td> </tr> </table><br><table border="1"> <tr> <td>TT</td> <td>MM</td> <td>JJJJ</td> </tr> </table><br><table border="1"> <tr> <td>TT</td> <td>MM</td> <td>JJJJ</td> </tr> </table>                                                                                                                                                                                                                                                                                                                                                                                                                                                                                                                              | TT   | MM | JJJJ | TT | MM | JJJJ | TT | MM | JJJJ |
| TT                                                                                                                                                                          | MM                                                                                                                                                                                                                                                                                                                                                                                                                                                                                                                                                                                                                                                                                                                                                                        | JJJJ |    |      |    |    |      |    |    |      |
| TT                                                                                                                                                                          | MM                                                                                                                                                                                                                                                                                                                                                                                                                                                                                                                                                                                                                                                                                                                                                                        | JJJJ |    |      |    |    |      |    |    |      |
| TT                                                                                                                                                                          | MM                                                                                                                                                                                                                                                                                                                                                                                                                                                                                                                                                                                                                                                                                                                                                                        | JJJJ |    |      |    |    |      |    |    |      |
| <b>1.3) Wenn <u>ja</u>, was wurde bei dieser/diesen Reoperation(en) durchgeführt?</b><br>(Gegebenenfalls mehreres ankreuzen)                                                | <input type="checkbox"/> Spülung<br><input type="checkbox"/> Synovektomie<br><input type="checkbox"/> Vollprothesenwechsel<br><input type="checkbox"/> Teilprothesenwechsel<br><input type="checkbox"/> Inlaywechsel<br><input type="checkbox"/> Patellaimplantation/-wechsel<br><input type="checkbox"/> Prothesenentfernung<br><input type="checkbox"/> Spacerimplantation<br><input type="checkbox"/> Gelenksversteifung (Athrodese)<br><input type="checkbox"/> Amputation<br><input type="checkbox"/> Fistelexzision (Fistelentfernung)<br><input type="checkbox"/> Anlegen eines VAC-Verbandes<br><input type="checkbox"/> Repositionierung mit Hautschnitt<br><input type="checkbox"/> Repositionierung ohne Hautschnitt<br><input type="checkbox"/> anderes _____ |      |    |      |    |    |      |    |    |      |

|                                                                                                           |                                                                                                                                                                                                                                                                                                                                                                                                                                                                                                    |      |    |      |
|-----------------------------------------------------------------------------------------------------------|----------------------------------------------------------------------------------------------------------------------------------------------------------------------------------------------------------------------------------------------------------------------------------------------------------------------------------------------------------------------------------------------------------------------------------------------------------------------------------------------------|------|----|------|
|                                                                                                           | <input type="checkbox"/> weiß ich nicht                                                                                                                                                                                                                                                                                                                                                                                                                                                            |      |    |      |
| <b>2.1) Hatten Sie seit dem XX.XX.XXXX eine Gelenksinfektion am rechten/linken Kniegelenk/Hüftgelenk?</b> | <input type="checkbox"/> ja<br><input type="checkbox"/> nein<br><input type="checkbox"/> weiß ich nicht                                                                                                                                                                                                                                                                                                                                                                                            |      |    |      |
| <b>2.2) Wenn ja, wann wurde diese festgestellt?</b><br>(Angabe des Jahres und des Monats reicht aus)      | <table border="1"> <tr> <td>TT</td> <td>MM</td> <td>JJJJ</td> </tr> </table>                                                                                                                                                                                                                                                                                                                                                                                                                       | TT   | MM | JJJJ |
| TT                                                                                                        | MM                                                                                                                                                                                                                                                                                                                                                                                                                                                                                                 | JJJJ |    |      |
| <b>2.3) Wenn ja, wie wurde diese festgestellt?</b><br>(Gegebenenfalls mehrere ankreuzen)                  | <input type="checkbox"/> Gelenkspunktion<br><input type="checkbox"/> intraoperativer Abstrich<br><input type="checkbox"/> Blutabnahme/Labor<br><input type="checkbox"/> klinisch/Beschwerden/Symptome<br><input type="checkbox"/> Wundheilungsstörung<br><input type="checkbox"/> Fistel<br><input type="checkbox"/> Szintigraphie<br><input type="checkbox"/> radiologisches Verfahren(Röntgen, MRT, CT,...)<br><input type="checkbox"/> anderes _____<br><input type="checkbox"/> weiß ich nicht |      |    |      |
| <b>3.1) Ist der/die Patient/-in verstorben?</b>                                                           | <input type="checkbox"/> ja<br><input type="checkbox"/> nein                                                                                                                                                                                                                                                                                                                                                                                                                                       |      |    |      |
| <b>3.2) Wenn ja, wann?</b>                                                                                | <table border="1"> <tr> <td>TT</td> <td>MM</td> <td>JJJJ</td> </tr> </table>                                                                                                                                                                                                                                                                                                                                                                                                                       | TT   | MM | JJJJ |
| TT                                                                                                        | MM                                                                                                                                                                                                                                                                                                                                                                                                                                                                                                 | JJJJ |    |      |
| <b>4.1) Gibt es sonst noch etwas, das Sie uns mitteilen möchten?</b><br>(Optional)                        |                                                                                                                                                                                                                                                                                                                                                                                                                                                                                                    |      |    |      |

Table S1. Identified microbial pathogens in 70 index revisions and 6 reinfections.

| Microorganisms                                            | Index Revisions (n = 70) | Reinfections (n = 6) |
|-----------------------------------------------------------|--------------------------|----------------------|
| <b>Monomicrobial infections</b>                           | <b>32 (45.7%)</b>        | <b>3 (50%)</b>       |
| <i>Candida albicans</i>                                   | 1 (1.4%)                 |                      |
| <i>Candida glabrata</i>                                   |                          | 1 (16.7%)            |
| <i>Propionibacterium acnes</i>                            | 2 (2.9%)                 |                      |
| <i>Propionibacterium avidum</i>                           | 1 (1.4%)                 |                      |
| <i>Staphylococcus aureus</i>                              | 1 (1.4%)                 | 1 (16.7%)            |
| <i>Staphylococcus epidermidis</i>                         | 16 (22.9%)               |                      |
| <i>Staphylococcus capitis</i>                             | 1 (1.4%)                 |                      |
| <i>Staphylococcus lugdunensis</i>                         | 1 (1.4%)                 |                      |
| Coagulase-negative <i>Staphylococcus</i> sp., unspecified | 2 (2.9%)                 |                      |
| Group F <i>Streptococcus</i> sp.                          | 1 (1.4%)                 |                      |

|                                                                                                                                                  |                   |                  |
|--------------------------------------------------------------------------------------------------------------------------------------------------|-------------------|------------------|
| <i>Streptococcus parasanguis</i>                                                                                                                 | 1 (1.4%)          |                  |
| <i>Streptococcus</i> sp., unspecified                                                                                                            | 1 (1.4%)          |                  |
| <i>Enterococcus faecium</i>                                                                                                                      | 1 (1.4%)          | 1 (16.7%)        |
| <i>Escherichia coli</i>                                                                                                                          | 1 (1.4%)          |                  |
| <i>Pseudomonas aeruginosa</i>                                                                                                                    | 2 (2.9%)          |                  |
| <b>Polymicrobial infections</b>                                                                                                                  | <b>38 (54.3%)</b> | <b>2 (33.3%)</b> |
| <i>Propionibacterium acnes</i> + <i>S. epidermidis</i>                                                                                           | 2 (2.9%)          |                  |
| <i>Propionibacterium</i> sp. + <i>S. epidermidis</i>                                                                                             | 2 (2.9%)          |                  |
| <i>Propionibacterium acnes</i> + <i>S. capitis</i>                                                                                               | 1 (1.4%)          |                  |
| <i>Propionibacterium</i> sp. + <i>S. hominis</i> + <i>S. epidermidis</i>                                                                         | 1 (1.4%)          |                  |
| <i>S. caprae</i> + <i>S. epidermidis</i>                                                                                                         | 1 (1.4%)          |                  |
| <i>S. warneri</i> + <i>S. epidermidis</i>                                                                                                        | 1 (1.4%)          |                  |
| <i>S. epidermidis</i> + mixed growth of CoNS                                                                                                     | 1 (1.4%)          |                  |
| <i>S. aureus</i> + <i>S. epidermidis</i>                                                                                                         | 2 (2.9%)          |                  |
| <i>S. aureus</i> + <i>S. hominis</i> + <i>S. epidermidis</i>                                                                                     | 1 (1.4%)          |                  |
| <i>S. aureus</i> + Viridans group <i>Streptococcus</i> sp. + <i>S. epidermidis</i>                                                               | 1 (1.4%)          |                  |
| <i>Streptococcus agalactiae</i> + <i>S. capitis</i>                                                                                              | 1 (1.4%)          |                  |
| <i>Streptococcus thermophilus</i> + Viridans group <i>Streptococcus</i> sp. + mixed growth of CoNS                                               | 1 (1.4%)          |                  |
| <i>Enterococcus faecalis</i> + <i>S. aureus</i> + <i>S. haemolyticus</i> + <i>S. epidermidis</i>                                                 | 1 (1.4%)          |                  |
| <i>Enterococcus faecalis</i> + CoNS                                                                                                              | 1 (1.4%)          |                  |
| <i>Enterococcus</i> sp. + <i>S. warneri</i> + CoNS                                                                                               | 1 (1.4%)          |                  |
| <i>Enterococcus</i> sp. + <i>S. capitis</i> + CoNS                                                                                               | 1 (1.4%)          |                  |
| <i>Finegoldia magna</i> + <i>Gemella morbillorum</i> + <i>Propionibacterium acnes</i> + <i>S. warneri</i>                                        | 1 (1.4%)          |                  |
| <i>Finegoldia magna</i> + CoNS                                                                                                                   | 1 (1.4%)          |                  |
| <i>Peptostreptococcus</i> sp. + <i>S. epidermidis</i>                                                                                            | 1 (1.4%)          |                  |
| <i>Anaerococcus prevotii</i> + <i>S. epidermidis</i>                                                                                             | 1 (1.4%)          |                  |
| <i>Micrococcus luteus</i> + <i>Propionibacterium acnes</i> + <i>S. hominis</i> + CoNS                                                            | 1 (1.4%)          |                  |
| <i>Micrococcus luteus</i> + <i>S. epidermidis</i>                                                                                                | 1 (1.4%)          |                  |
| <i>Micrococcus</i> sp. + <i>S. epidermidis</i>                                                                                                   | 1 (1.4%)          |                  |
| <i>Micrococcus</i> sp. + <i>S. lugdunensis</i>                                                                                                   | 1 (1.4%)          |                  |
| <i>Brevibacterium casei</i> + <i>Aerococcus viridans</i>                                                                                         | 1 (1.4%)          |                  |
| <i>Corynebacterium macginleyi</i> + <i>S. epidermidis</i>                                                                                        | 1 (1.4%)          |                  |
| <i>Corynebacterium mucifaciens</i> + <i>S. epidermidis</i>                                                                                       | 1 (1.4%)          |                  |
| <i>Corynebacterium striatum</i> + <i>Peptococcus</i> sp. + <i>S. epidermidis</i>                                                                 | 1 (1.4%)          |                  |
| <i>Corynebacterium</i> sp. + <i>S. epidermidis</i> + CoNS                                                                                        | 1 (1.4%)          |                  |
| <i>Bacillus</i> sp. + Group B <i>Streptococcus</i> sp.                                                                                           | 1 (1.4%)          |                  |
| <i>Bacillus</i> sp. + unspecified species                                                                                                        | 1 (1.4%)          |                  |
| <i>Fusobacterium</i> sp. + <i>Enterococcus</i> sp. + <i>Peptostreptococcus anaerobius</i>                                                        | 1 (1.4%)          |                  |
| <i>Proteus vulgaris</i> + <i>S. epidermidis</i>                                                                                                  | 1 (1.4%)          |                  |
| <i>Klebsiella pneumoniae</i> + <i>Corynebacterium</i> sp. + <i>Propionibacterium acnes</i> + unspecified anaerobe + <i>S. epidermidis</i> + CoNS | 1 (1.4%)          |                  |
| <i>Ralstonia picketti</i> + Group B <i>Streptococcus</i> sp. + <i>S. aureus</i> + <i>S. epidermidis</i>                                          | 1 (1.4%)          |                  |
| <i>S. haemolyticus</i> + <i>S. epidermidis</i>                                                                                                   |                   | 1 (16.7%)        |
| <i>Ralstonia insidiosa</i> + <i>S. epidermidis</i>                                                                                               |                   | 1 (16.7%)        |
| <b>Missing culture</b>                                                                                                                           |                   | <b>1 (16.7%)</b> |

Abbreviations: S., *Staphylococcus*; CoNS, coagulase-negative *Staphylococcus* sp. (unspecified).

Detected species are depicted once per patient.
